# Supplementary material for: Transcriptome-wide Identification and Quantification of Caffeoylquinic Acid Biosynthesis Pathway and Prediction of their Putative BAHDs Gene Complex in <em>A. spathulifolius</em>
Source: Preprints.org preprint supplement (doi:10.20944/preprints202105.0527.v1), 2021-05-21
Supplement: Supplementary file 1 [file Supplementary.docx]

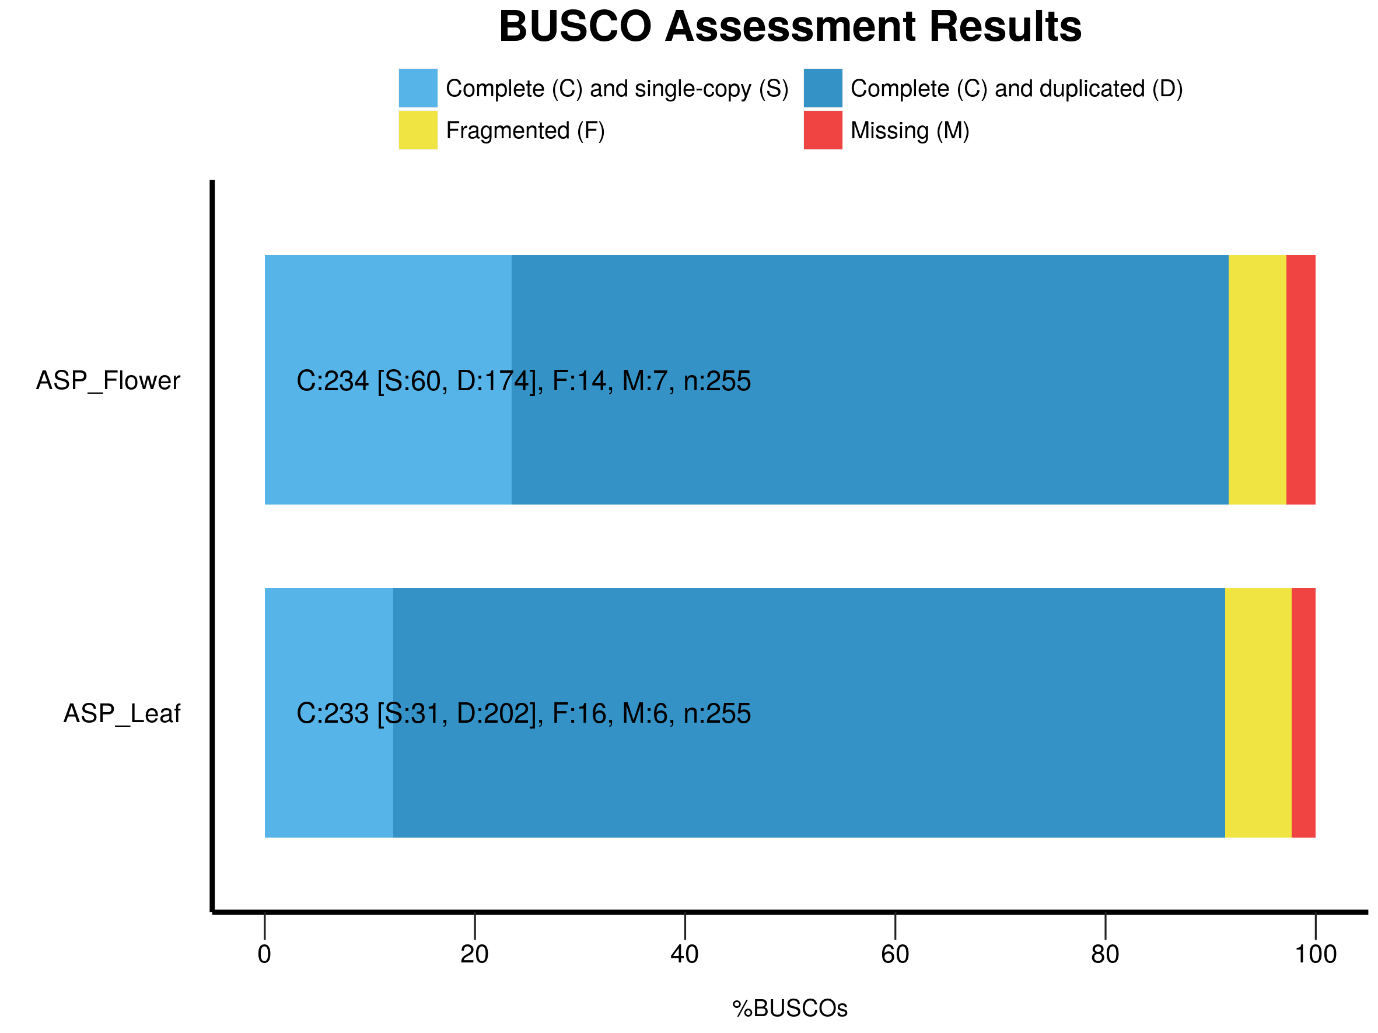


Figure S1. BUSCO assessments shows the quality of transcriptome assembled uningenes. C:complete, D: Duplicated, F: fragments, M: missing unigenes


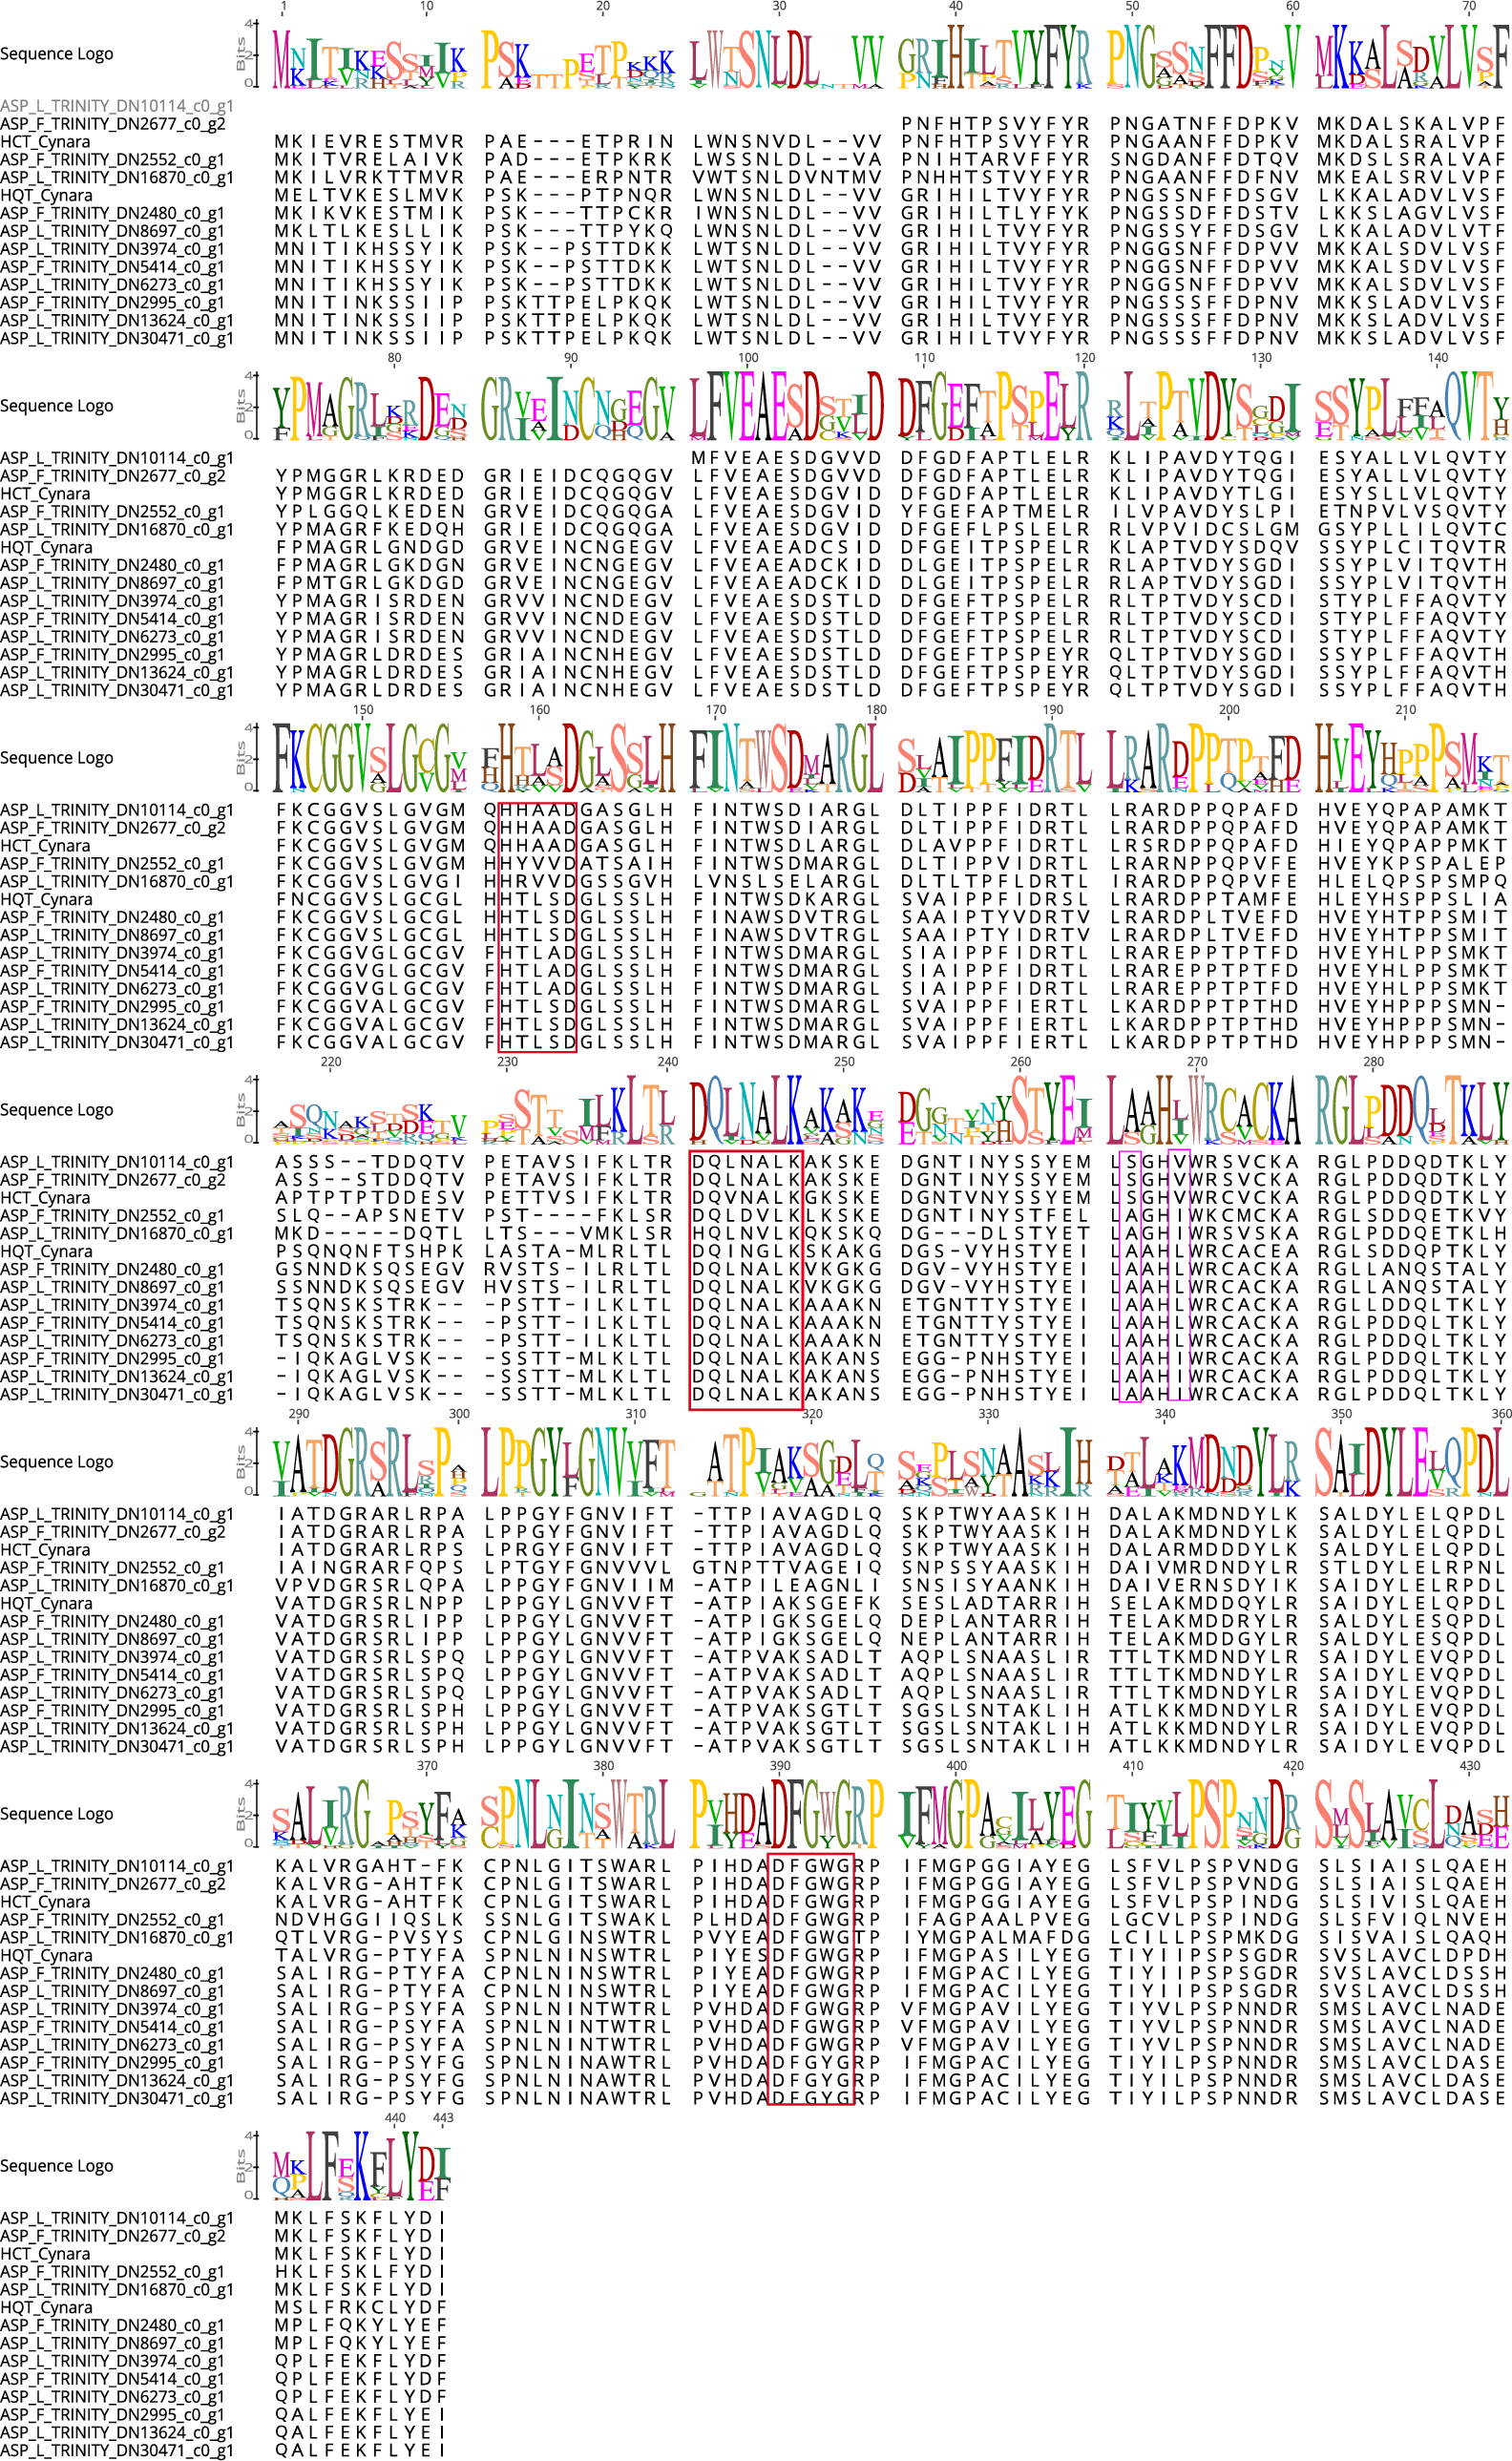


Figure S2: Alignment of HQT and HCT unigenes of *A. spathulifolius* to the *Cynara* species. Red and pink bar indicates the most conserved domain of HCT and HQT genes.


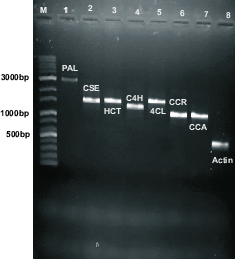


Figure S3 : Gel plot of RT-PCR of PPP involved unigene of A. spathulifolius leaf to confirm denovo assembled unigenes to procced to quantitative PCR.
