# Supplementary material for: Transcriptome-wide Identification and Quantification of Caffeoylquinic Acid Biosynthesis Pathway and Prediction of their Putative BAHDs Gene Complex in <em>A. spathulifolius</em>
Source: Preprints.org preprint supplement (doi:10.20944/preprints202105.0527.v1), 2021-05-21
Supplement: Supplementary file 3 [file Table S1.xlsx]

## Sheet: Sheet1
					amplicon size			seq	amplicon size
FCH	Forward	GAGACGGGTGAACCTAAACTATT	Reverse	TCAATGCTCTTATATCGACCGTT	243	HCT-1_R	HCLCD	TGTAGGTTTGGTGGTAAGATGGG	191
4CL	Forward	TTATACTCCATCATCGCTCTTGG	Reverse	GAAACCGACCCAGATTTCAAAAT	233	HCT-1_F		TAAGTCATGGAGGAAGCTGCTTT
SOH	Forward	CTGTGTATTTCTACCGACCCAAT	Reverse	TTCCTAAGGAGCAATCAATGACA	267	HCT-2_R	HCVCD	AAACGGGTTTGGGCTTAAAATCC	201
CAA	Forward	TGCAATTAGTTACCTCCACATCA	Reverse	TTGATTCATGGTCTCTCTCAGTG	228	HCT-2_F		TAGCTTTGGAAGTCACGGATGTC
CCR	Forward	CCTGATGATGTCGTTGATGAGA	Reverse	TACATGGACGTATGCTTGGAC	270	HQT-1_R	HTLGD	CCATTGCCATACACCCACTTAGA	201
CSE	Forward	GATAATAGCAGTGAACCCAAAGC	Reverse	CCTTCATACAACTTCAACGCTTT	228	HQT-1_F		CAGTATTAAACGAGCTGCCAACA
PAL	Forward	CAAGTTTGGATTACGGGTTCAAA	Reverse	AGTCGATTTCATGTTCTCTTCCA	254	HQT-2_R	HTLSD	CCACACTTGAAACGTGTAACCTG	201
Actin	Forward	ATTCATGAGACCACCTACAACTC	Reverse	TCGTCATATTCACCCTTGGAAAT	272	HQT-2_F		AGATGGTGATGGCAGAGTTGAAA
elf1	Forward	GGGTGACAATATGATTGAGAGGT	Reverse	CATACCCACGCTTGATATCCTTA	314	HQT-3_R	HTMSD	GCCATCCTAATCACATTTGCTGG	201
						HQT-3_F		CAACACTACTCCCTTGACCTTCA
						HQT-4_R	HTLAD	TTAAGCACACTGCCAATGACATG	201
						HQT-4_F		CTGCTTTGATTCGTGGTCCTAGT
						HQT-5_R	HTMSD	TAGTTAGAGCCTCCCTGATCACA	201
						HQT-5_F		AGACATGCACCAGAACTAATCGT
